# Supplementary material
Source: publisher site journal article supplement (https://www.spandidos-publications.com/8422/downloadSupplementary)

Figure S1. Graphical abstract: RUVBL1 and CRAF activate MEK/ERK signaling to promote osteogenic differentiation in PDLSCs independently; ODN MT01 enhances this effect additively. ODN, oligodeoxynucleotide; PDLSC, periodontal ligament stem cell; ALP, alkaline phosphatase; RUVBL1, RuvB-like AAA ATPase-1; OE, overexpression; sh, short hairpin; MSC, mesenchymal stem cell; CRAF, C-Raf proto-oncogene serine/threonine-protein kinase.

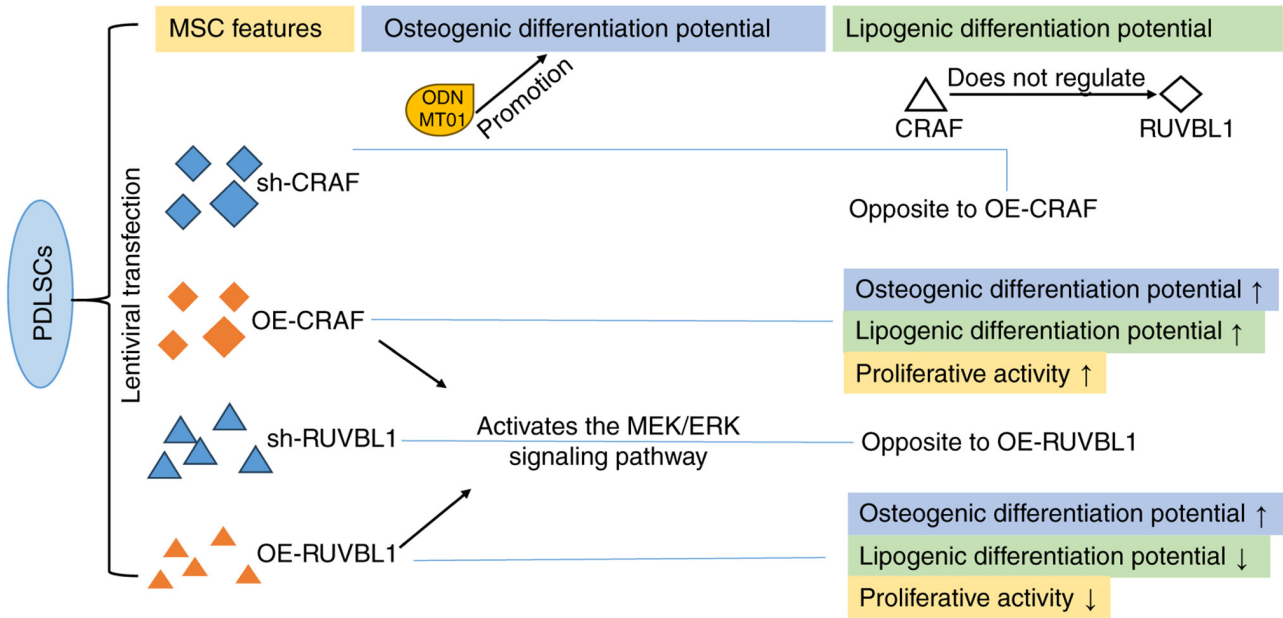

Supplement: Supplementary file 1 [file downloadSupplementary]
